# Supplementary material
Source: MDPI journal article supplement (https://www.mdpi.com/2073-4352/13/7/1075)
Supplement: s1 [file s1]

## Supplementary Materials

# Analyzing transfer characteristics of disordered polymer field-effect transistors for intrinsic device parameter extraction

Minho Yoon

Department of Physics and Institute of Quantum Convergence Technology,  
Kangwon National University, Chuncheon, 24341, South Korea

### Corresponding Author

Electronic mail: minhoyoon78@gmail.com

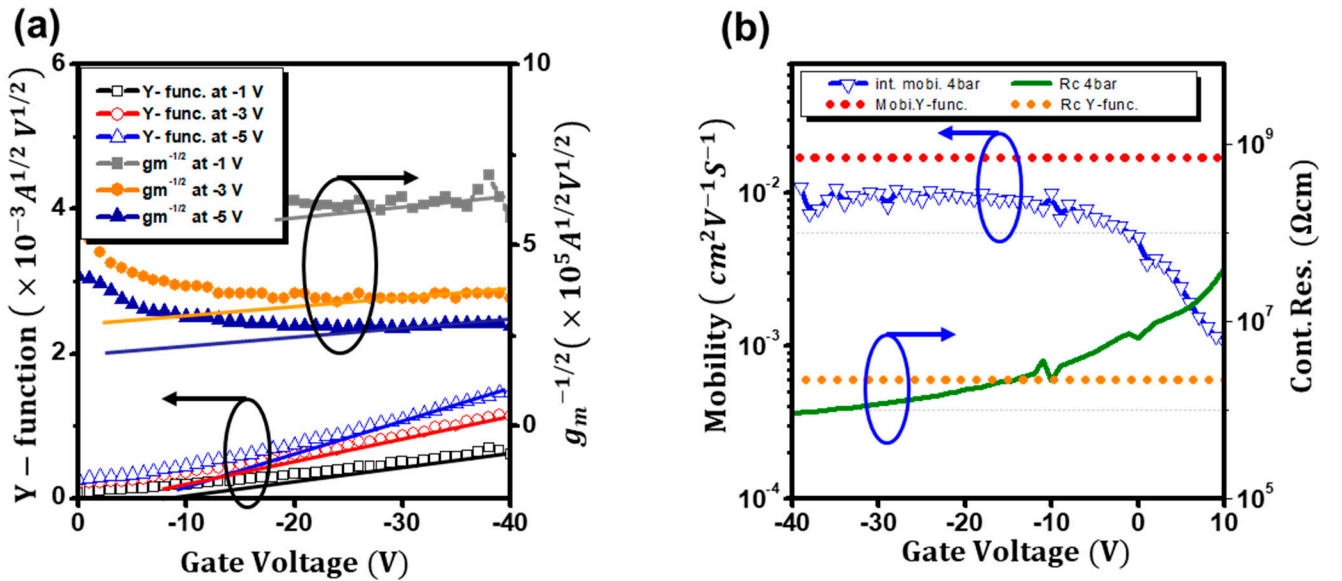

**Figure S1.** (a) Y and inverse-square root of  $g_m$  plots obtained using the Y-function method. (b) Extracted contact resistance and mobility of the PFETs from the four-probe method, respectively.

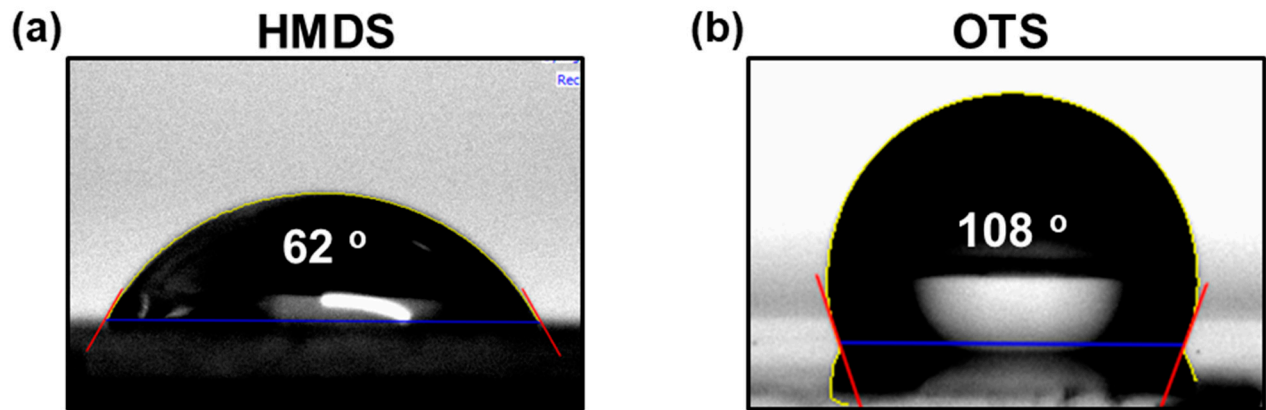

**Figure S2.** Contact angle images of droplets of DI water on (a) HMDS and (b) OTS-treated substrates.

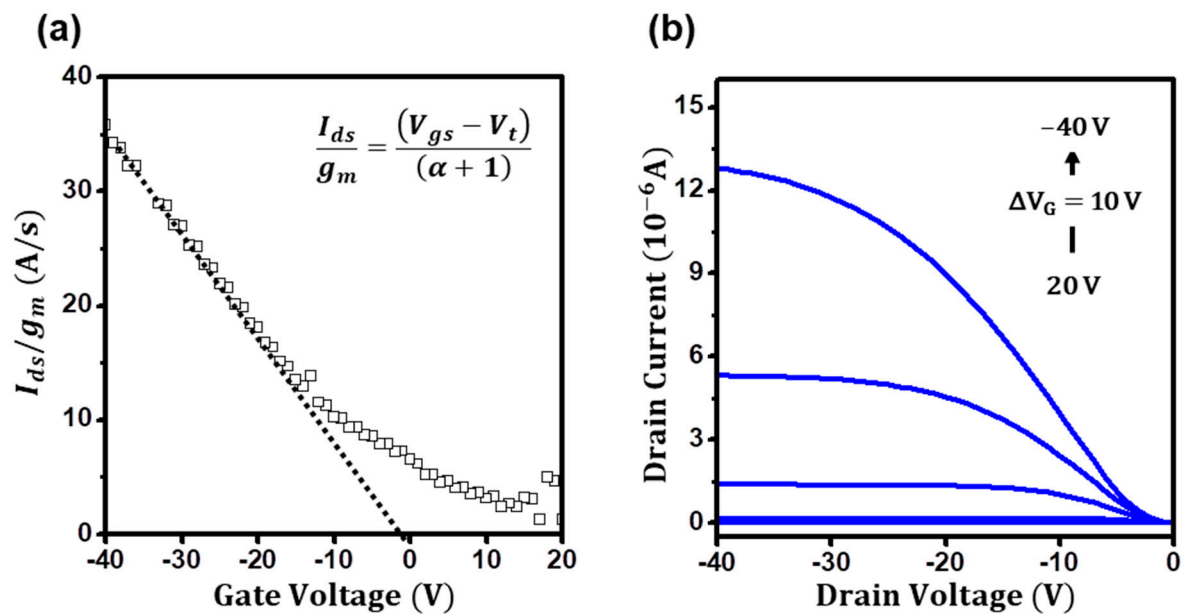

**Figure S3.** (a) The extraction plot of  $I_{ds}/g_m$  for the OTS-treated DPP-DTT PFETs. (b) Output characteristics of the OTS-treated DPP-DTT PFETs.
